# Supplementary material
Source: ML conference proceedings conference paper supplement (https://openreview.net/forum?id=H2aizfRWXH)
Supplement: supplementary_material [file attachment]

# BiGS: Bidirectional Primitives for Relightable 3D Gaussian Splatting

## Supplementary Material

### 8. Reciprocity of $s$

We represent  $s$  using bidirectional spherical harmonics as in Eq. (4). We intend to prove if  $c_{ij} = c_{ji}$ , then  $s$  is reciprocal, mathematically,  $s(\omega_i, \omega_o) = s(\omega_o, \omega_i)$ . We rewrite Eq. (4) by merging summation terms of index  $(i, j)$  and  $(j, i)$ , having

$$s(\omega_i, \omega_o) = \sum_{i=1}^n \sum_{j=i+1}^n [c_{ij}y_i(\omega_i)y_j(\omega_o) + c_{ji}y_j(\omega_i)y_i(\omega_o)] + \sum_{i=1}^n c_{ii}y_i(\omega_i)y_i(\omega_o)$$

The second summation is the same for  $s(\omega_i, \omega_o)$  and  $s(\omega_o, \omega_i)$ . To equate the first summation, we need to have  $c_{ij}y_i(\omega_i)y_j(\omega_o) + c_{ji}y_j(\omega_i)y_i(\omega_o)$  equal to  $c_{ji}y_j(\omega_o)y_i(\omega_i) + c_{ij}y_j(\omega_o)y_i(\omega_i)$ . Then  $c_{ij} = c_{ji}$  gives us the following:

$$\begin{aligned} & c_{ij}y_i(\omega_i)y_j(\omega_o) + c_{ji}y_j(\omega_i)y_i(\omega_o) \\ &= c_{ji}y_i(\omega_i)y_j(\omega_o) + c_{ij}y_i(\omega_i)y_j(\omega_o) \\ &= c_{ji}y_j(\omega_o)y_i(\omega_i) + c_{ij}y_j(\omega_o)y_i(\omega_i). \end{aligned}$$

□

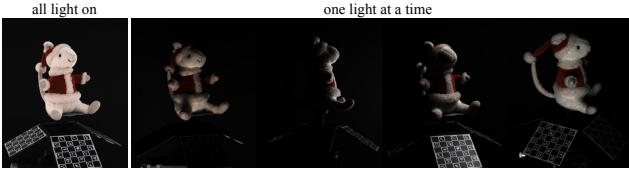

Figure 10. **Example images** of our capture OLAT dataset.

Table 1. The runtime and model size of our examples, sorted by number of primitives. Our relighting step roughly scales linearly with the number of primitives, providing 40–50 fps of relighting and rendering. Each Gaussian primitive costs 1,089 optimizable parameters, amounting to a per-Gaussian 4.254 KB memory cost using 32-bit floating point numbers.

| Model           | Time (ms) |           |            | # Primitives | Model Size   |             |
|-----------------|-----------|-----------|------------|--------------|--------------|-------------|
|                 | Relight   | Rasterize | Total Time |              | # Parameters | Memory (MB) |
| BUNNYMETAL      | 1.75      | 19.38     | 21.13      | 16 693       | 18 178 677   | 69.35       |
| DRAGON          | 3.71      | 20.96     | 24.67      | 31 252       | 34 033 428   | 129.83      |
| SPOT            | 3.83      | 18.52     | 22.35      | 33 087       | 36 031 743   | 137.45      |
| FURBALLSPECULAR | 4.02      | 19.23     | 23.25      | 34 619       | 37 700 091   | 143.82      |
| IRIDESCENCEBALL | 4.02      | 19.20     | 23.21      | 35 035       | 38 153 115   | 145.54      |
| FURBALLDIFFUSE  | 5.11      | 19.63     | 24.74      | 44 441       | 48 306 249   | 184.62      |
| KNOB            | 6.23      | 19.25     | 25.48      | 53 429       | 58 184 181   | 221.96      |
| HAIRBALL        | 15.90     | 19.30     | 35.20      | 127 787      | 139 160 043  | 530.85      |
| PLUSHY          | 19.31     | 17.18     | 36.49      | 153 467      | 167 125 563  | 637.53      |

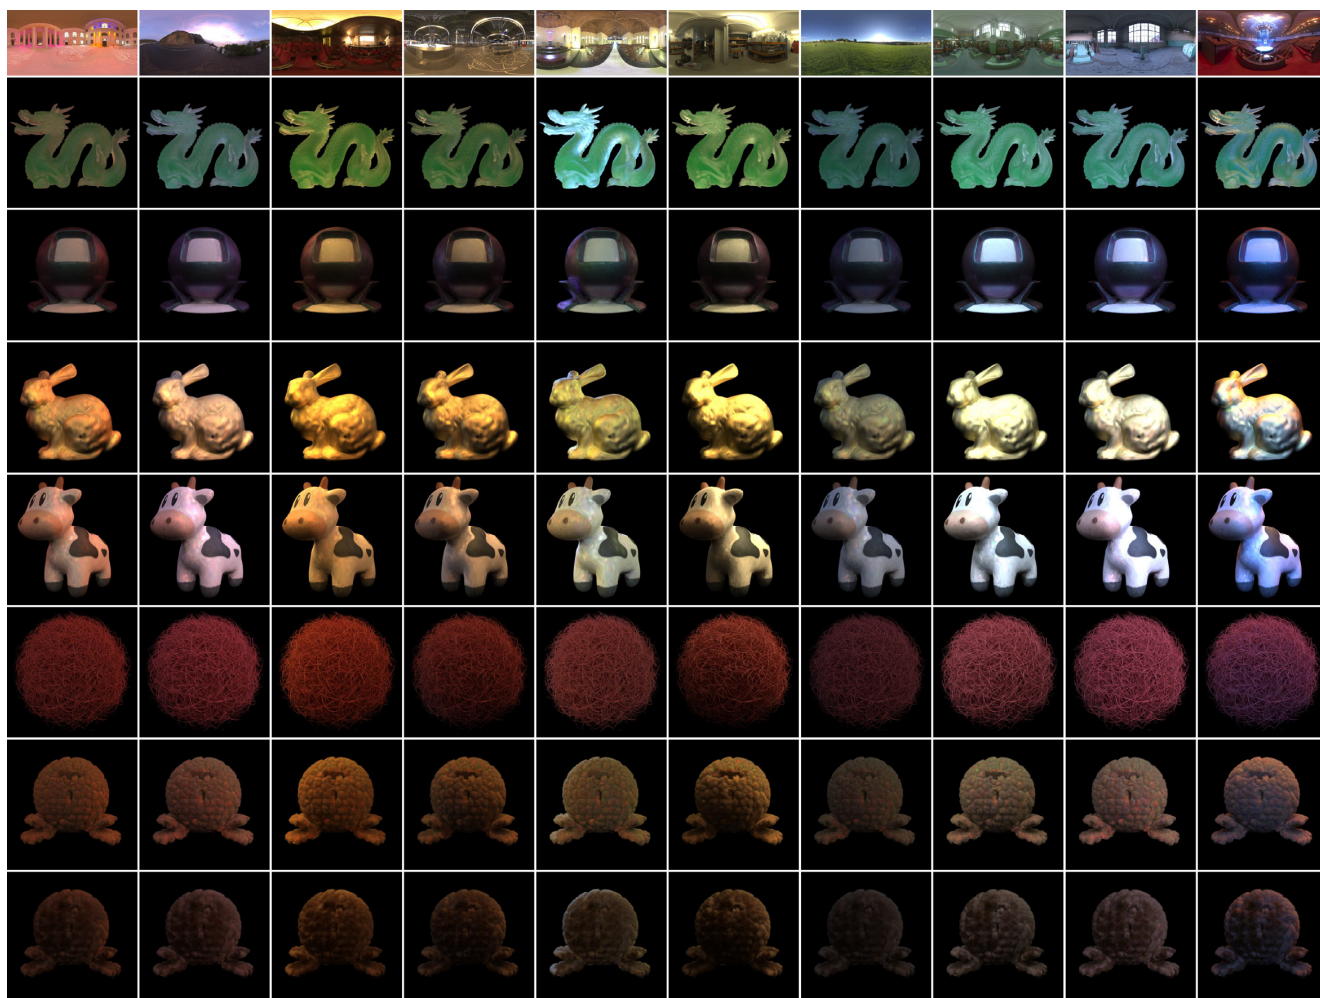

Figure 11. Extra environment light relighting
